# Supplementary material
Source: publisher figshare collection journal article supplement (https://diabetesjournals.figshare.com/articles/dataset/_/12827219)
Supplement: Supplementary file 1 [file 1]

Archive with 11 entries (11 files):
- Online_Supplemental_Materials.pdf
- Supplemental_figure1.pdf
- Supplemental_figure2.pdf
- Supplemental_figure3.pdf
- Supplemental_figure4.pdf
- Supplemental_figure5.pdf
- Supplemental_table1.xlsx
- Supplemental_table2.docx
- Supplemental_table3.docx
- Supplemental_table4.docx
- Supplemental_table5.xlsx
