# Supplementary material
Source: publisher figshare collection journal article supplement (https://diabetesjournals.figshare.com/articles/dataset/_/12827219)
Supplement: Supplementary file 1 [file 1 › Online_Supplemental_Materials.pdf]

## Supplemental Figure Legends

### Supplemental Figure 1: Schematic of the gene-gene interaction analyses performed in this study

The figure demonstrates the two approaches that were used for the interaction analyses in this study – single variant- and polygenic score-based. The single variant analyses were based on the variants in the *T2D-joint set* (comprising of the *T2D-risk set* and the *T2D-variance set*); the polygenic score-based analyses were implemented using one overall polygenic score and six partitioned polygenic scores (pPS) that were constructed based on variants in the *T2D-risk set*.

### Supplemental Figure 2: Power estimates for the pairwise gene-gene interaction analysis for variants in the *T2D-joint set*

The blue curve shows the power estimate for the pairwise interaction analysis for the *T2D-joint set* variants (MAF=5%) as a function of the interaction effect. The power calculation was based on the following parameters: (i) main effect OR on T2D=1.1; (ii) sample size=376,375, with a T2D case:control ratio (per UK Biobank) of 0.044; (iii)  $\alpha=4 \times 10^{-7}$  ( $\alpha=0.05$ , corrected for 126,253 pairwise tests). As noted, there was >70% power to detect interactions of  $OR \geq 1.5$  between two *T2D-joint set* variants of MAF=5%.

A similar power estimate curve for two *T2D-joint set* variants of MAF=50% has also been shown (black dotted curve).

### Supplemental Figure 3: Power estimates for the gene-gene interaction between variants from the *T2D-joint set* and the *genome set*

The curve shows the power estimate for the interaction analysis between variants from the *T2D-joint set* (MAF=5%) and the *genome set*, as a function of the MAF of the *genome set* variant. The power calculation was based on the following parameters: (i) main effect OR on T2D for *T2D-joint set* variant=1.1; (ii) main effect OR on T2D for *genome set* variant=1.0; (iii) interaction effect OR between the variants=1.5; (iv) sample size=375,736, with a T2D case:control ratio (per UK Biobank) of 0.044; and (v)  $\alpha=10^{-10}$  ( $\alpha=0.05$ , with Bonferroni adjustment for 503 genome-wide analyses). As noted, for *genome set* variants with  $MAF \geq 10\%$ , there was >75% power to detect an interaction with a *T2D-joint set* variant of MAF=5%.

**Supplemental Figure 4: Quantile-quantile plots for the gene-gene interaction analysis using a polygenic score-based approach**

A polygenic score (PS)-based approach was used to perform a gene-gene interaction analysis with genome-wide variants. The quantile-quantile plots demonstrate the results of the genome-wide interaction analysis for the following seven PS for T2D: overall PS, pPS<sub>adiposity</sub>, pPS<sub>IS1</sub>, pPS<sub>IS2</sub>, pPS<sub>IA</sub>, pPS<sub>dyslipidemia</sub> and pPS<sub>mix</sub>.

(pPS = partitioned polygenic scores; IS = insulin secretion; IA = insulin action)

**Supplemental Figure 5: Manhattan plots demonstrating the results for the gene-gene interaction analysis using a polygenic score-based approach**

A polygenic score (PS)-based approach was used to perform a gene-gene interaction analysis with genome-wide variants. The Manhattan plots demonstrate the results of the genome-wide interaction analysis for the following seven PS for T2D: overall PS, pPS<sub>adiposity</sub>, pPS<sub>IS1</sub>, pPS<sub>IS2</sub>, pPS<sub>IA</sub>, pPS<sub>dyslipidemia</sub> and pPS<sub>mix</sub>.

The red horizontal line in each plot demarcates the Bonferroni-corrected significance threshold ( $p=7 \times 10^{-9}$ , accounting for seven GWAS).

(pPS = partitioned polygenic scores; IS = insulin secretion; IA = insulin action)
