# Supplementary material
Source: publisher figshare collection journal article supplement (https://diabetesjournals.figshare.com/articles/dataset/_/12827219)
Supplement: Supplementary file 1 [file 1 › Supplemental_figure1.pdf]

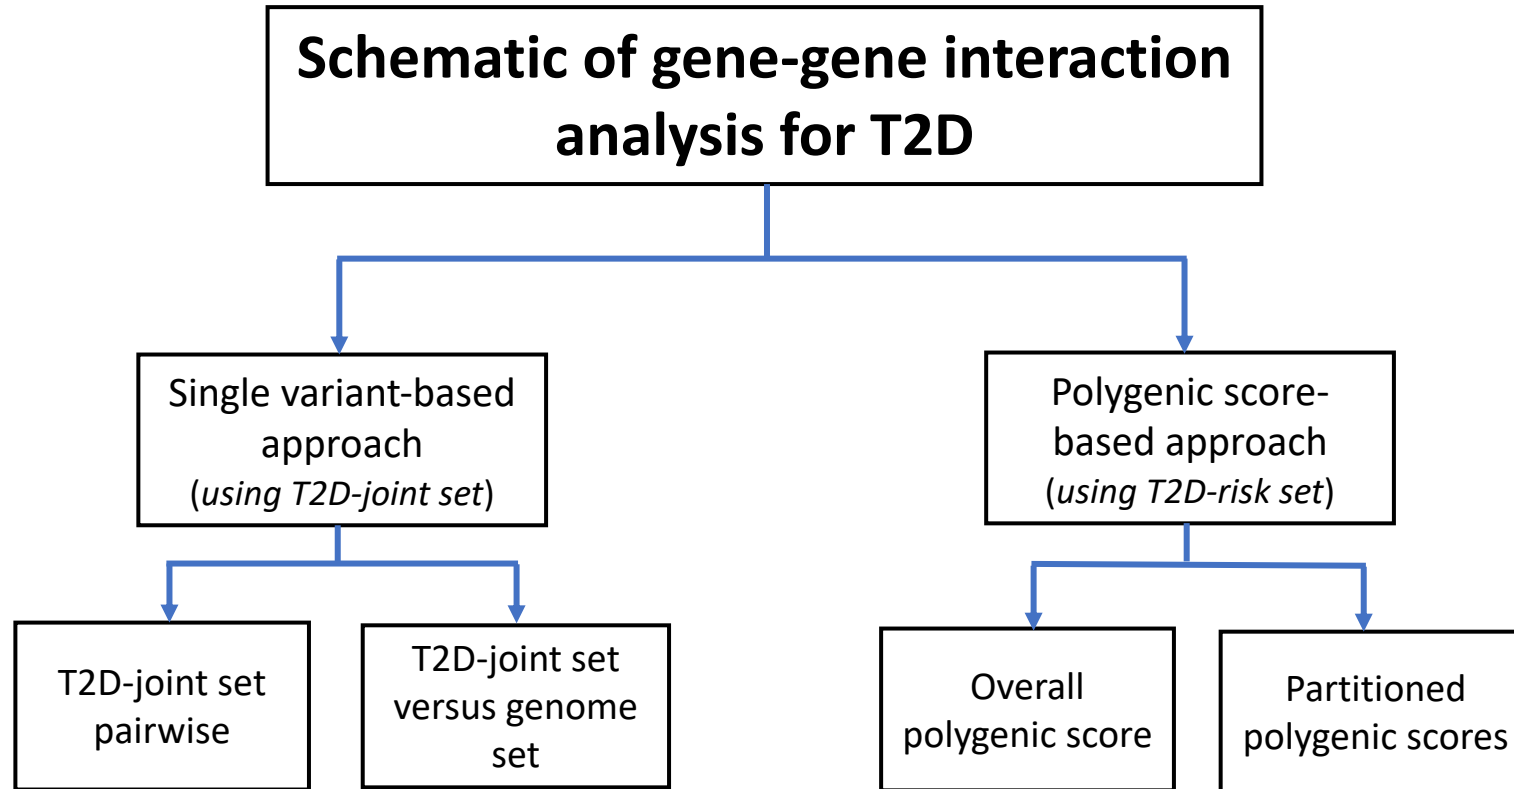

\*The '*T2D-joint set*' refers to the set of 503 variants comprising of the variants from the *T2D-risk set* (403 variants) and the *T2D-variance set* (100 variants)
