# Supplementary material
Source: publisher figshare collection journal article supplement (https://diabetesjournals.figshare.com/articles/dataset/_/12827219)
Supplement: Supplementary file 1 [file 1 › Supplemental_table1.xlsx]

## Sheet: Sheet1
Supplemental Table 1: The list of variants that were most significantly associated with T2D variance (T2D-variance set)
Variant ID	Chr	Pos (bp)*	Nearest gene
rs4659283	1	120638468	NOTCH2
rs11801270	1	201234486	PKP1
rs12136041	1	221718224	DUSP10
rs2950835	2	27750545	GCKR
rs78572881	2	43762959	THADA
rs6751406	2	45911022	PRKCE
rs1822468	2	68513487	CNRIP1
rs1543254	2	100346204	AFF3
rs10208511	2	161863052	TANK
rs9288097	2	184581204	NUP35
rs57658202	2	192101723	MYO1B
rs2972143	2	227116365	LOC646736
rs192511776	3	1567854	CNTN6
rs60710264	3	12484928	PPARG
rs339687	3	42741512	HHATL
rs73084914	3	52929014	TMEM110
rs12381229	3	72882658	SHQ1
rs2677762	3	178875554	PIK3CA
rs10937719	4	6295322	WFS1
rs4974827	4	9588288	MIR548I2
rs10938872	4	21969495	KCNIP4
rs371277267	4	49114257	CWH43
rs7693442	4	154116055	TRIM2
rs75846434	4	166345229	CPE
rs34703139	4	182302392	LINC00290
rs66696714	5	1006181	NKD2
rs1948770	5	9664553	LINC02112
rs116782923	5	102331465	PAM
rs9405631	6	3323761	SLC22A23
rs10456816	6	18026208	KIF13A
rs10946402	6	20715826	CDKAL1
rs9273070	6	32612241	HLA-DQA1
rs12192131	6	72298478	LINC01626
rs10498884	6	73530851	KCNQ5
rs58187453	6	93664044	EPHA7
rs9480626	6	106415916	PRDM1
rs4896668	6	144028153	PHACTR2
rs73011397	6	151205678	MTHFD1L
rs9365674	6	158411156	SYNJ2
rs117329402	7	17799597	SNX13
rs2527813	7	43984254	POLR2J4/UBE2D4
rs62457570	7	45769923	SEPT7P2
rs4727612	7	104410065	LHFPL3
rs28700151	7	156800271	MNX1
rs28870170	8	3356318	CSMD1
rs2442479	8	6353892	MCPH1
rs34162231	8	11003088	XKR6
rs11783838	8	22343400	PPP3CC
rs56215468	8	105434051	DPYS
rs1458917	8	110306603	NUDCD1
rs2737231	8	116650219	TRPS1
rs10965247	9	22132729	CDKN2B-AS1
rs2769056	9	77554629	C9orf40
rs12554581	9	111983577	EPB41L4B
rs780149	10	80934948	ZMIZ1
rs11553840	10	82278180	TSPAN14
rs113917243	10	93801280	CPEB3
rs7087591	10	94473629	HHEX
rs4447106	10	102359760	HIF1AN
rs4142097	10	108316278	SORCS1
rs7073243	10	112602267	RBM20
rs34872471	10	114754071	TCF7L2
rs1278272	10	127748908	ADAM12
rs234864	11	2857297	KCNQ1
rs117838176	11	49286896	FOLH1
rs629137	11	75858710	UVRAG
rs73025299	11	128771062	KCNJ5
rs56338611	12	12001137	ETV6
rs12424756	12	24117433	SOX5
rs7307237	12	55328777	TESPA1
rs61921611	12	66367726	HMGA2
rs117374882	12	96141866	NTN4
rs74590803	12	133336071	ANKLE2
rs1215470	13	80706455	LINC01080
rs146364717	13	109205408	MYO16
rs55637162	14	44028751	FSCB
rs12912777	15	38852386	RASGRP1
rs35866115	15	92669892	SLCO3A1
rs6498750	16	17967692	XYLT1
rs17817449	16	53813367	FTO
rs31065	16	55351107	IRX6
rs11658063	17	36103872	HNF1B
rs111656662	17	42168287	HDAC5
rs2599300	17	57367050	GDPD1
rs4147990	17	66913936	ABCA8
rs7230764	18	564147	CETN1
rs516788	18	24367065	AQP4
rs76350347	18	56505781	LINC01926
rs74536825	18	60464216	PHLPP1
rs9964143	18	74096733	ZNF516
rs2072601	19	15733195	CYP4F8
rs74359672	19	35340011	LINC01801
rs59858288	19	54014030	ZNF331
rs302469	19	56348516	NLRP4
rs112426085	20	13205751	ISM1
rs742614	20	32482632	CHMP4B
rs5762419	22	28344525	TTC28-AS1
rs7289805	22	44833973	LINC01656
rs73443301	22	45902912	FBLN1
rs28681372	22	50351977	PIM3
Variants that demonstrate heterogeneity in T2D variance across the three genotypes can represent underlying gene-gene interactions. Levene's test was used to evaluate equality of T2D variance (after pre-adjustment for covariates and standardisation of residuals) across three genotypes per variant. This list represents the 100 most significant index variants (for 1 Mb blocks of the genome) associa…
(T2D = Type 2 diabetes; Chr = Chromosome; Pos = Position)
*Genomic build 37
