# Supplementary material
Source: publisher figshare collection journal article supplement (https://diabetesjournals.figshare.com/articles/dataset/_/12827219)
Supplement: Supplementary file 1 [file 1 › Supplemental_table3.docx]

| **Variant 1 (*T2D-joint set*)** | | | | **Variant 2 (*T2D-joint set*)** | | | | **Interaction effect  (OR)** | **Interaction p-value** |
| --- | --- | --- | --- | --- | --- | --- | --- | --- | --- |
| **Variant ID** | **Chr** | **Pos (bp)*** | **Nearest gene** | **Variant ID** | **Chr** | **Pos (bp)*** | **Nearest gene** |
| rs629137 | 11. 11 | 75,858,710 | *UVRAG* | rs76011118 | 9 | 22,133,773 | *CDKN2A/B* | 1.24 | 9.91 x 10-6 |
| rs34965774 | 1 1. 12 | 118,412,373 | *KSR2* | rs61676547 | 17 | 65,892,507 | *BPTF* | 1.13 | 4.81 x 10-5 |
| rs41277236 | 10 | 71,332,301 | *NEUROG3* | rs6518681 | 22 | 30,609,554 | *MTMR3/ ASCC2* | 1.37 | 5.02 x 10-5 |
| rs13085136 | 3 | 72,865,183 | *SHQ1* | rs7987740 | 13 | 109,947,213 | *IRS2* | 1.14 | 5.78 x 10-5 |
| rs61921611 | 12 | 66,367,726 | *HMGA2* | rs177045 | 10 | 71,321,279 | *NEUROG3* | 1.08 | 8.71 x 10-5 |
| rs111827885 | 4 | 616,608 | *PCGF3* | rs7756992 | 6 | 2,0679,709 | *CDKAL1* | 1.54 | 9.25 x 10-5 |
| rs6498750 | 16 | 17,967,692 | *XYLT1* | rs505922 | 9 | 136,149,229 | *ABO* | 1.07 | 9.71 x 10-5 |
| rs3845281 | 5 | 14,610,134 | *ANKH* | rs4976033 | 5 | 67,714,246 | *PIK3R1* | 1.11 | 9.74 x 10-5 |
| rs362307 | 4 | 3,241,845 | *HTT* | rs117001013 | 22 | 32,348,841 | *YWHAH* | 1.22 | 0.0001 |
| rs17791513 | 9 | 81,905,590 | *TLE4* | rs77864822 | 12 | 97,848,775 | *RMST* | 1.29 | 0.0001 |

**Supplemental Table 3: Summary of the pairwise interactions for the *T2D-joint set* variants with the strongest association p-values**

A pairwise interaction analysis was performed for the index-variants in the *T2D-joint set* (comprising of the variants from the *T2D-risk set* and the *T2D-variance set*) - we refer to this as the ‘*T2D-joint set pairwise*’ gene-gene interaction analysis. This table provides the association statistics for the pairwise interactions with the strongest p-values. None of the pairwise interactions crossed the Bonferroni-corrected significance threshold (p=4x10-7)

(Chr = Chromosome; Pos = Position; OR = Odds ratio)
*Genomicbuild 37
