# Supplementary material
Source: publisher figshare collection journal article supplement (https://diabetesjournals.figshare.com/articles/dataset/_/12827219)
Supplement: Supplementary file 1 [file 1 › Supplemental_table5.xlsx]

## Sheet: Sheet1
Supplemental Table 5: Summary of the gene-gene interactions using a polygenic score-based approach with the strongest association p-values
Polygenic score (PS) for T2D		Variant ID*	Chr	Nearest gene	EA	NEA	Interaction effect (OR)	Interaction p-value
Overall polygenic score		rs72856504	2	LRP1B	C	T	1.252	1.79 x 10-6
		rs115087983	5	ST8SIA4	T	G	1.2276	2.44 x 10-6
		rs528424916	6	IFNGR1	T	A	1.229	2.44 x 10-6
		rs4019381	7	PTPRN2	C	T	1.10314	3.61 x 10-6
		rs12275123	11	IFITM3	A	G	1.059	3.87 x 10-6
		rs73128214	1	FMN2	T	C	1.08155	4.29 x 10-6
		rs75902892	6	UTRN	T	C	1.173	4.30 x 10-6
		rs72852605	2	LRP1B	T	C	1.214	4.96 x 10-6
		rs35353526	19	ZNRF4	A	G	1.063	5.56 x 10-6
		rs142678052	11	LOC105369443	A	G	1.305	5.77 x 10-6
Partitioned polygenic score (pPS)	Adiposity	rs17081444	13	LINC00457	A	G	1.064	8.61 x 10-7
		rs12864326	13	LINC00457	T	C	1.064	8.88 x 10-7
		rs11840219	13	LINC00457	A	G	1.063	1.12 x 10-6
		rs78551630	7	LRRC72	C	A	1.299	1.17 x 10-6
		rs1980911	13	LINC00457	A	C	1.062	1.87 x 10-6
		rs12584741	13	LINC00457	A	G	1.062	1.92 x 10-6
		rs148367517	16	LINC02188	T	C	1.253	2.66 x 10-6
		rs112659977	14	SUPT16H	C	T	1.25612	2.73 x 10-6
		rs12584778	13	LINC00457	A	G	1.061	2.86 x 10-6
		rs744904	4	HOPX	G	A	1.056	3.01 x 10-6
	Insulin secretion 1	rs13067009	3	LNCSRLR	G	A	1.245	3.23 x 10-7
		rs34786298	3	LNCSRLR	T	C	1.243	3.57 x 10-7
		rs75224024	3	LRRC15	G	T	1.218	5.30 x 10-7
		rs71300369	3	LNCSRLR	C	A	1.235	7.79 x 10-7
		rs35905574	3	LNCSRLR	G	T	1.235	8.84 x 10-7
		rs71300358	3	LNCSRLR	C	T	1.234	9.29 x 10-7
		rs113382150	3	LNCSRLR	A	G	1.234	9.47 x 10-7
		rs113636321	3	LNCSRLR	C	A	1.234	9.67 x 10-7
		rs115130525	16	SMG1P7	C	T	1.103	9.89 x 10-7
		rs71300359	3	LNCSRLR	T	A	1.233	1.00 x 10-6
	Insulin secretion 2	rs34018	5	FGF1	C	T	1.066	6.04 x 10-7
		rs34019	5	FGF1	T	C	1.065	6.82 x 10-7
		rs144937507	11	TENM4	T	C	1.1443	8.55 x 10-7
		rs58980923	2	LDAH	C	T	1.1744	8.65 x 10-7
		rs200360096	5	ARHGAP26	C	T	1.14797	9.83 x 10-7
		rs16987997	2	LDAH	C	T	1.17288	1.06 x 10-6
		rs62122119	2	LDAH	G	A	1.17261	1.11 x 10-6
		rs12475848	2	LDAH	G	A	1.17247	1.13 x 10-6
		rs12473025	2	LDAH	T	C	1.17247	1.14 x 10-6
		rs35487064	2	LDAH	C	T	1.17247	1.14 x 10-6
	Insulin action	rs117902895	10	CCNY	C	G	1.26566	8.89 x 10-7
		rs1832444	6	MIR4465	A	C	1.19175	2.98 x 10-6
		rs11923816	3	CPNE4	G	C	1.06112	3.64 x 10-6
		rs34389755	20	PLCB4	C	T	1.26743	3.72 x 10-6
		rs10934976	3	CPNE4	T	C	1.06067	4.22 x 10-6
		rs10517942	4	SPOCK3	T	C	1.05664	4.46 x 10-6
		rs79230986	20	PTPRT	A	G	1.235	5.11 x 10-6
		rs7649716	3	CPNE4	T	A	1.05977	5.76 x 10-6
		rs75256389	20	SNAP25-AS1	G	C	1.313	6.89 x 10-6
		rs194231	5	FGF18	T	C	1.11062	6.94 x 10-6
	Dyslipidemia	rs79489058	7	CHN2	T	C	1.215	1.09 x 10-7
		rs117388851	7	CHN2	A	G	1.213	1.45 x 10-7
		rs78780105	7	CHN2	T	A	1.213	1.71 x 10-7
		rs118152194	7	CHN2	T	A	1.209	2.07 x 10-7
		rs6972140	7	CHN2	T	A	1.209	2.20 x 10-7
		rs117282983	7	CHN2	C	T	1.208	2.48 x 10-7
		rs116682286	7	CHN2	G	A	1.207	3.13 x 10-7
		rs77810474	7	CHN2	A	T	1.204	3.77 x 10-7
		rs142170904	6	TSG1	T	A	1.25976	6.02 x 10-7
		rs72919332	11	HIPK3	G	T	1.10035	1.81 x 10-6
	Mix	rs72485359	2	TGFA/ADD2	A	G	1.10387	1.28 x 10-7
		rs62520574	8	LINC01609	T	G	1.15	2.98 x 10-7
		rs62520573	8	LINC01609	A	G	1.148	3.59 x 10-7
		rs12054399	3	SOX2-OT	C	T	1.12	4.35 x 10-7
		rs4326119	5	IQGAP2	A	C	1.06975	6.41 x 10-7
		rs12476158	2	ADD2	C	A	1.09004	6.80 x 10-7
		rs608862	9	TTC39B	T	G	1.058	9.91 x 10-7
		rs138332936	11	LOC101928944	A	T	1.166	1.15 x 10-6
		rs58567301	3	SOX2-OT	A	G	1.114	1.40 x 10-6
		rs12273350	11	PKNOX2	A	G	1.05753	1.51 x 10-6
Gene-gene interaction analysis was performed for genome-wide variants (MAF >= 1%) using a polygenic score (PS)-based approach - one overall PS and six partitioned PS (adiposity, insulin secretion 1, insulin secretion 2, insulin action, dyslipidemia and mix) were used. The table provides the association statistics for the gene-gene interactions ( for each PS) with the strongest p-values.
(T2D = Type 2 diabetes; Chr = Chromosome; EA = Effect allele; OR = Odds ratio)
*All variants at a locus, including those in LD, have been listed

## Sheet: Sheet2
T
G
A
T
G
C
C
C
G
G
G
C
G
A
C
G
C
T
G
A
A
C
T
A
T
T
G
A
T
A
T
C
C
T
T
T
A
A
C
T
G
C
C
T
C
C
G
A
C
C
C
G
A
A
A
T
A
T
A
T
G
G
G
T
C
A
G
T
G
G
