# Supplementary material
Source: publisher figshare collection journal article supplement (https://diabetesjournals.figshare.com/articles/dataset/_/12827219)

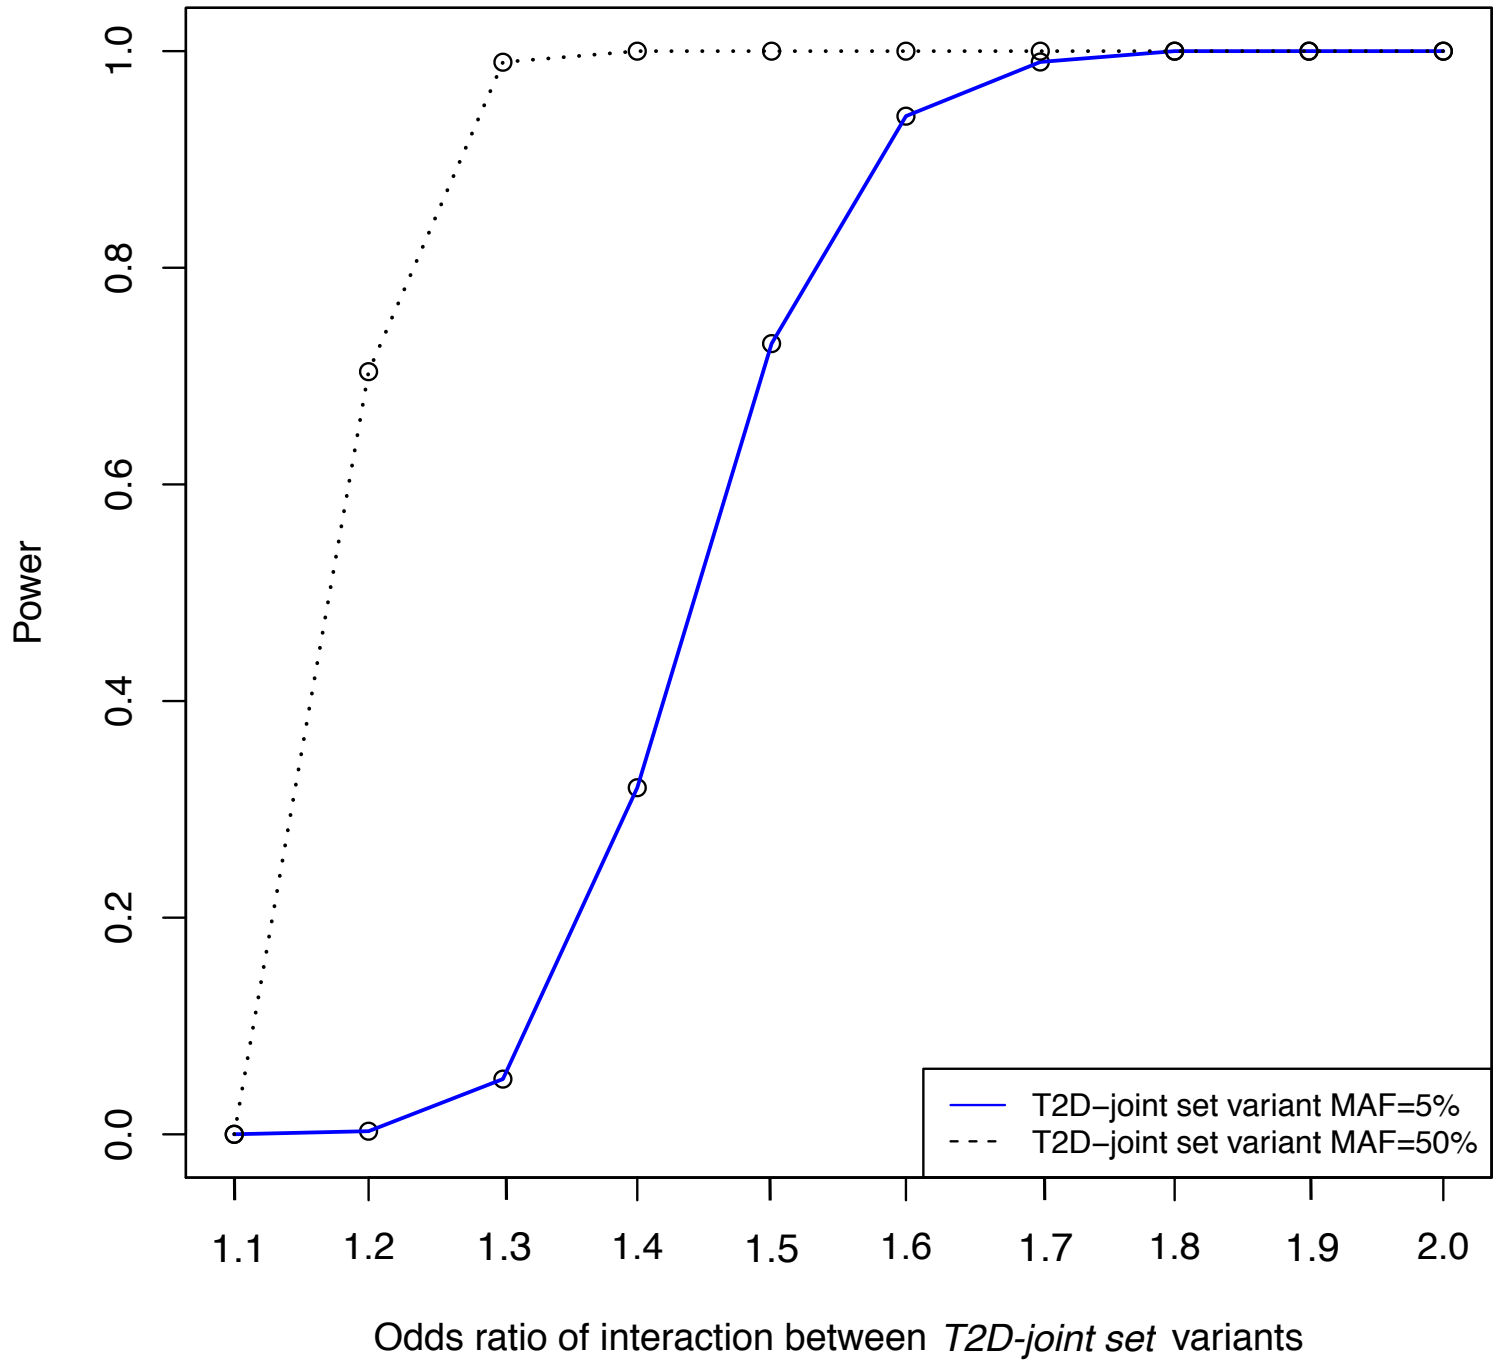

Supplement: Supplementary file 1 [file 1 › Supplemental_figure2.pdf]

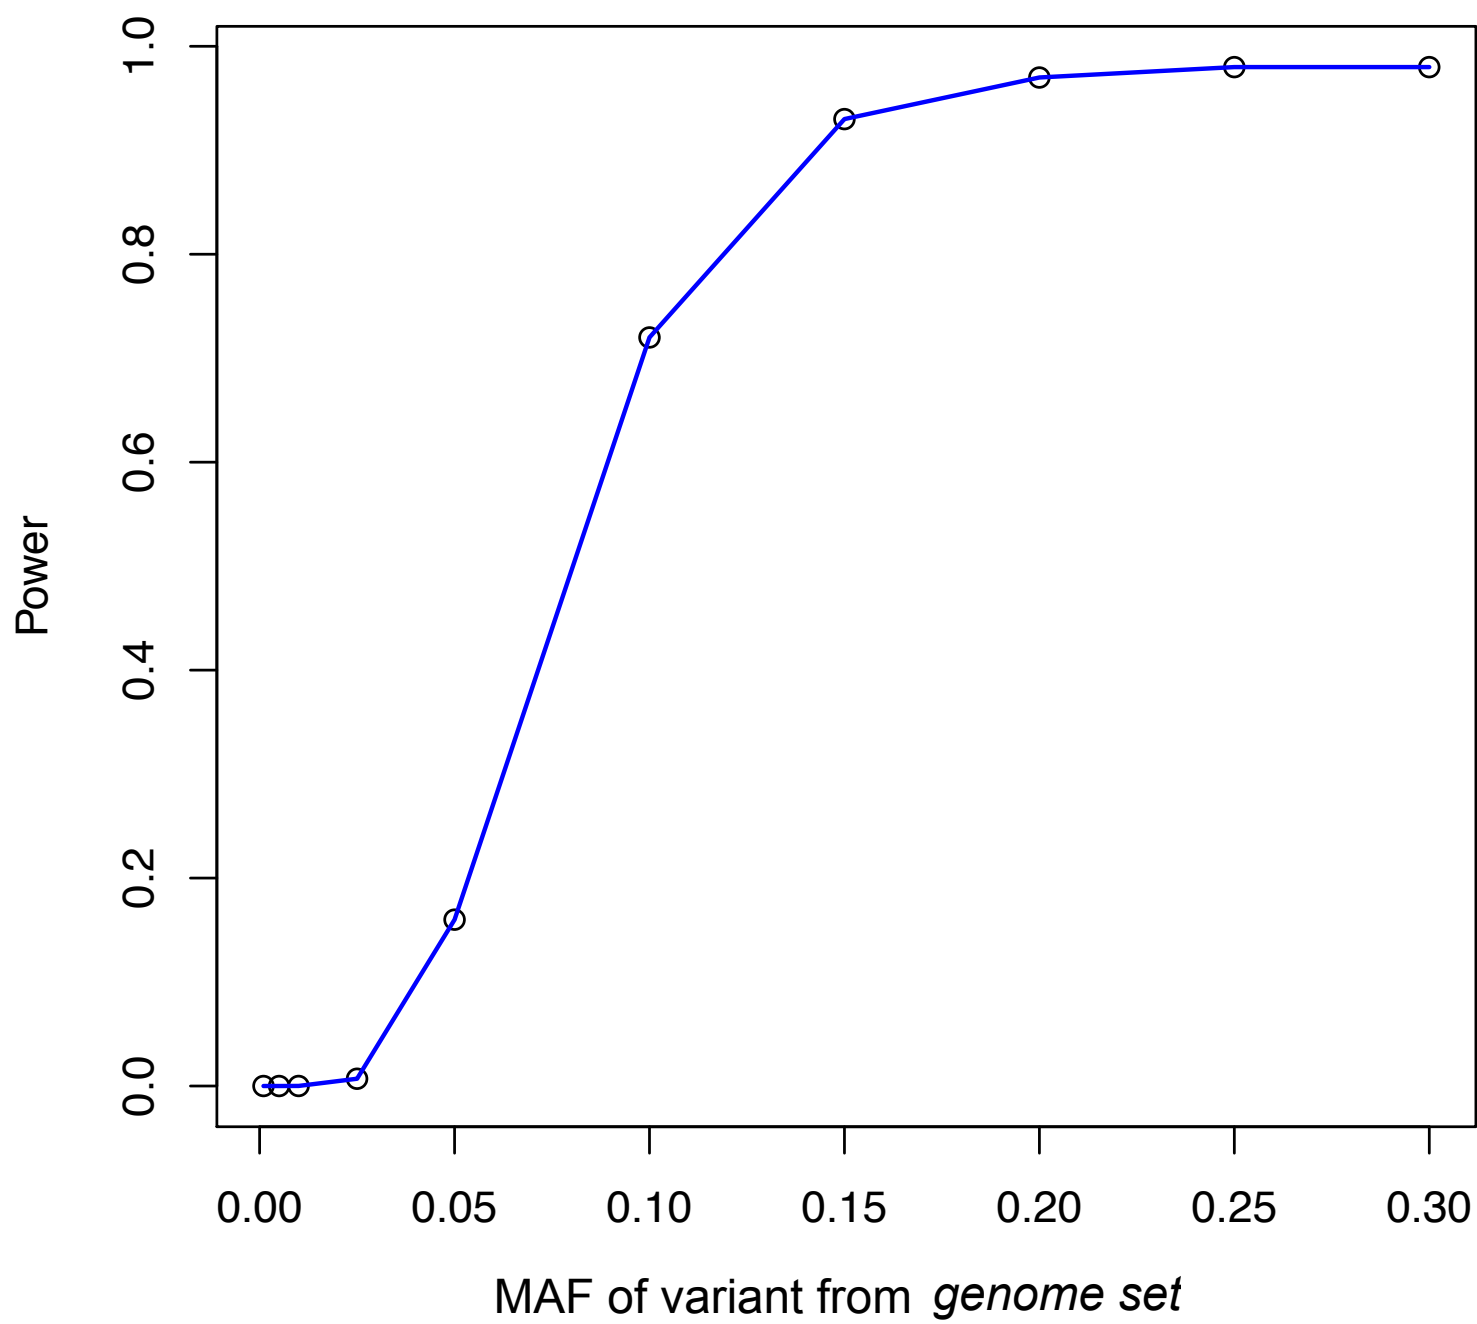

Supplement: Supplementary file 1 [file 1 › Supplemental_figure3.pdf]

Overall T2D PS versus Genome

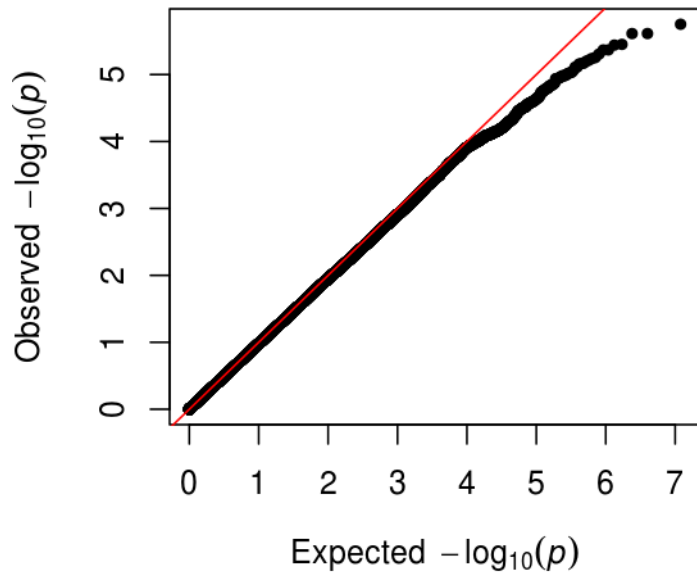

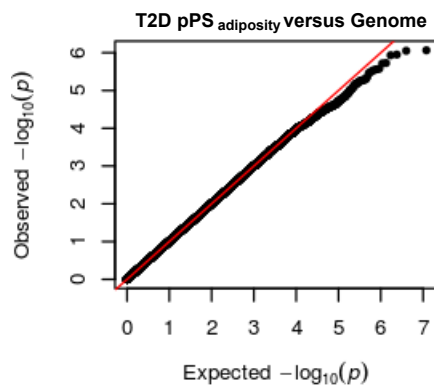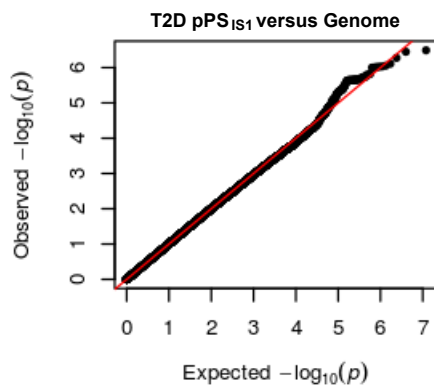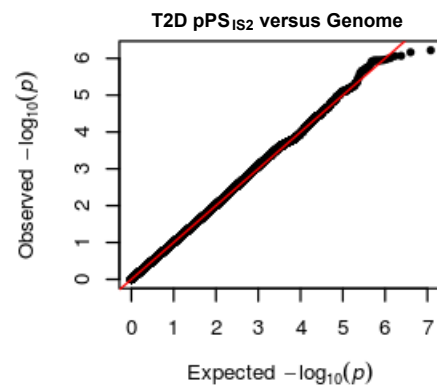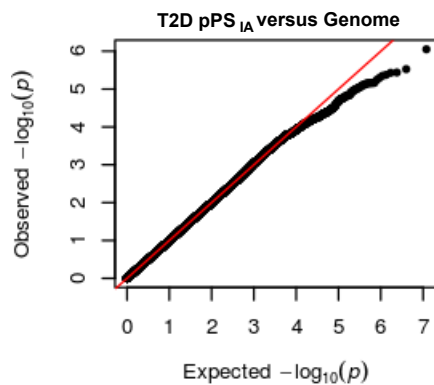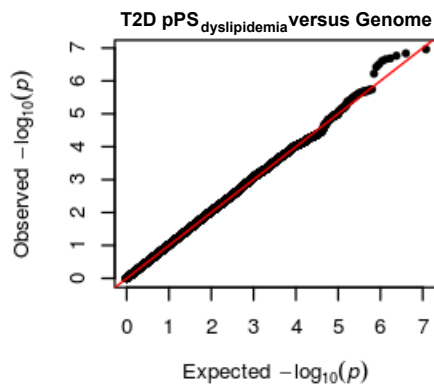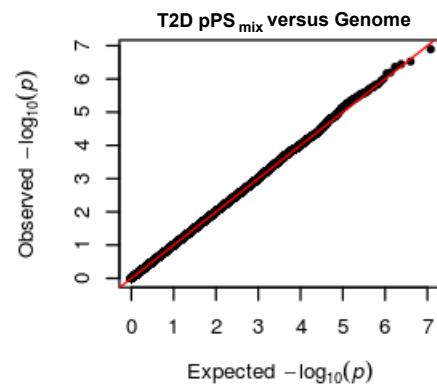

Supplement: Supplementary file 1 [file 1 › Supplemental_figure4.pdf]

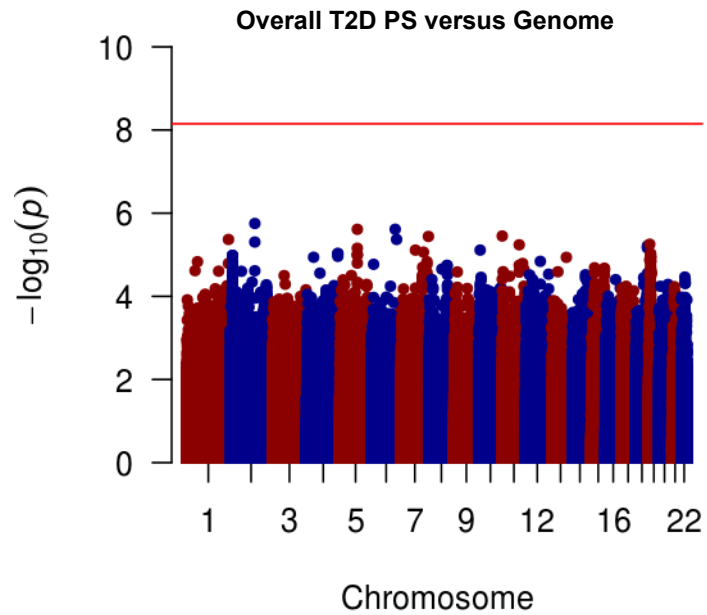

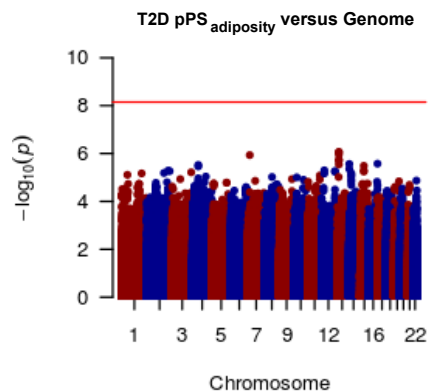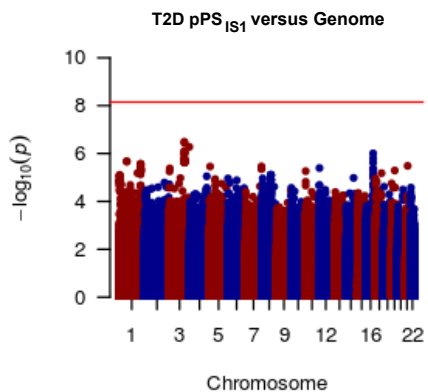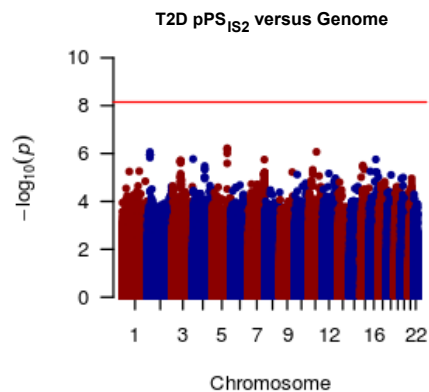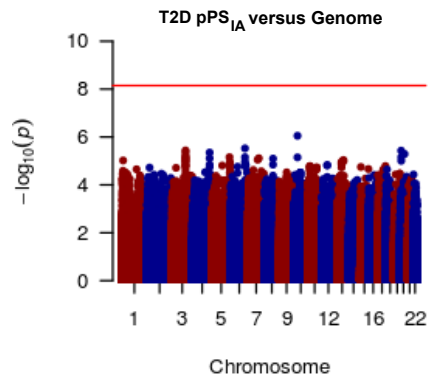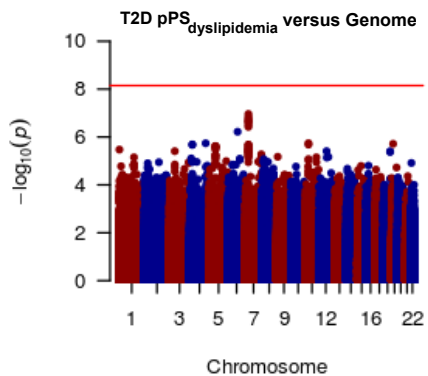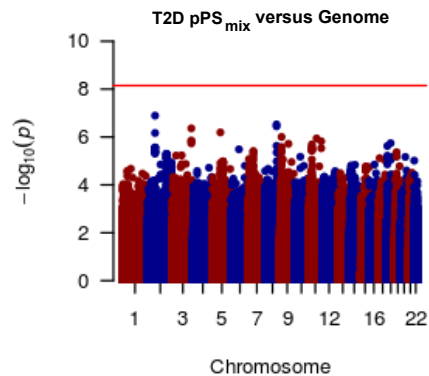

Supplement: Supplementary file 1 [file 1 › Supplemental_figure5.pdf]
